# Supplementary material for: Adaptation of the master antioxidant response connects metabolism, lifespan and feather development pathways in birds
Source: PubMed Central journal article supplement (PMC7234996; doi:10.1038/s41467-020-16129-4), 2020-05-18
Supplement: 41467_2020_16129_MOESM1_ESM.pdf [file 41467_2020_16129_MOESM1_ESM.pdf]

## Supplementary Information

Adaptation of the master antioxidant response connects metabolism, lifespan and feather development pathways in birds

Castiglione et al.

# Supplementary Figure 1

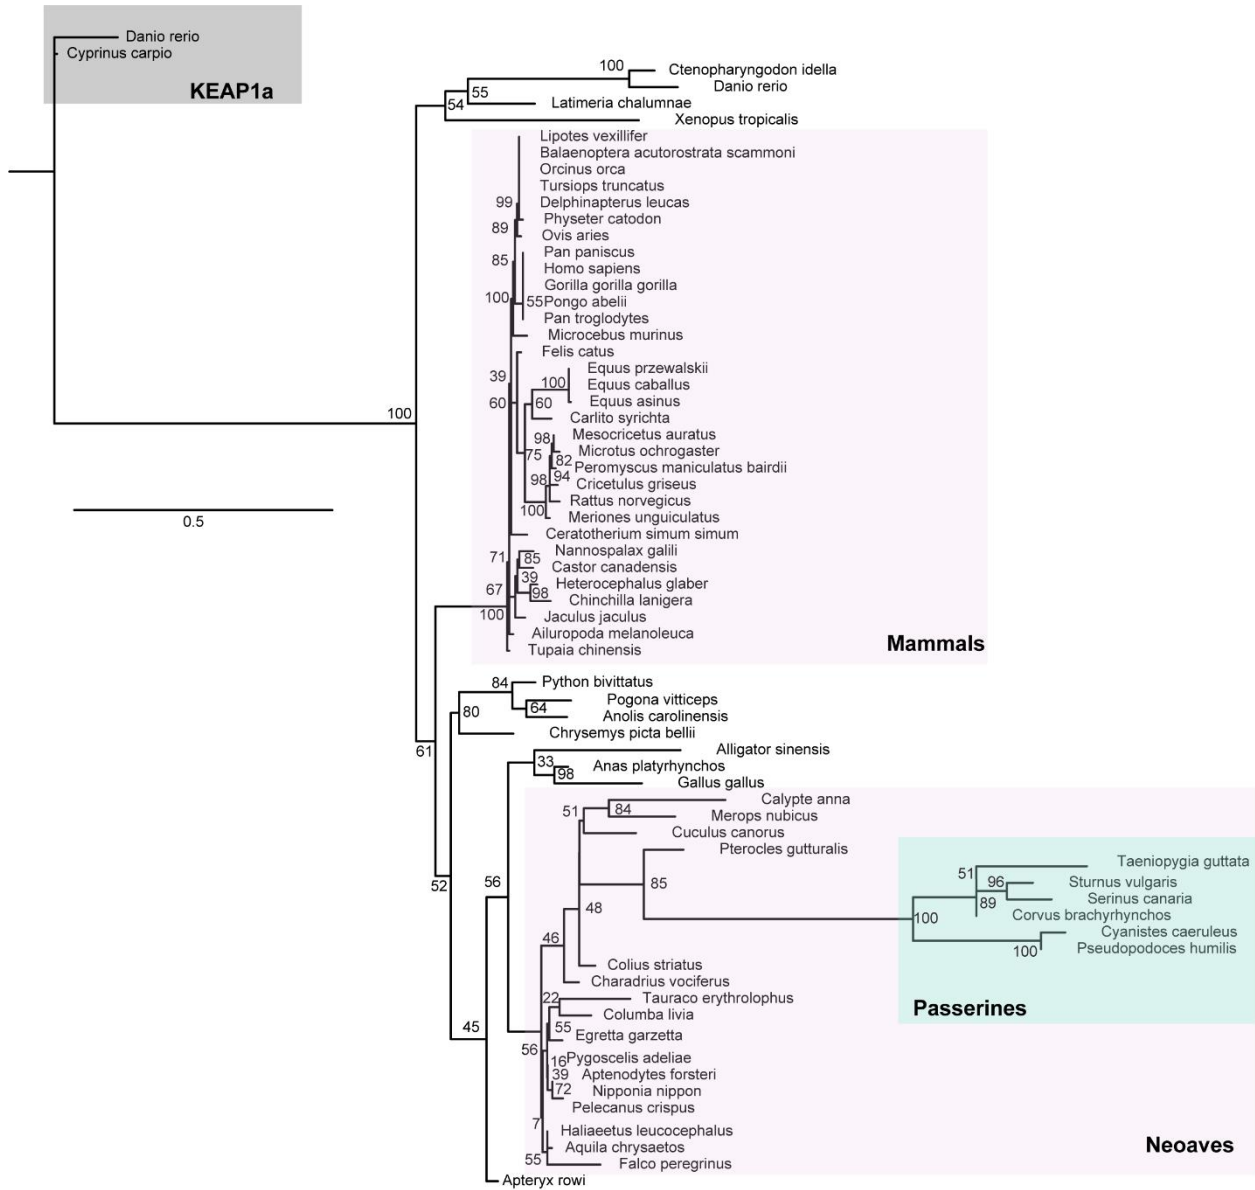

KEAP1 gene tree generated to confirm identity of KEAP1 coding-sequences.

## Supplementary Figure 2.

**A**

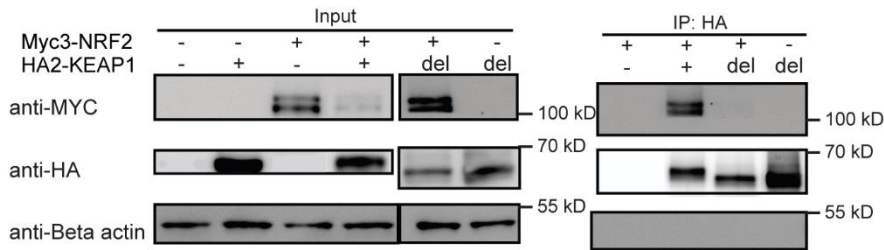

**B**

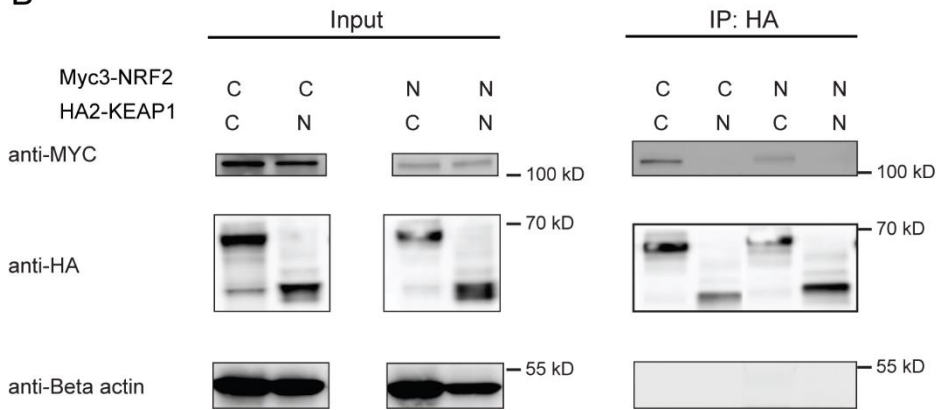

Co-immunoprecipitation of HA2-KEAP1 and Myc3-NRF2 from HEK293T cells transfected with various NRF2 and KEAP1 constructs. **(A)** Human wild-type NRF2 (+) was co-transfected with either wild-type KEAP1 (+) or  $\Delta$ 442-488 KEAP1 (del). **(B)** Chicken (C) or Neoaves (N; *Zonotrichia albicollis*) NRF2 was co-transfected with Chicken (C) or Neoaves (N) (*Taeniopygia guttata*) KEAP1. Source data are provided as a Source Data file. All of these immunoblot experiments were repeated twice each, with each independent replicate showing similar results.

**Supplementary Figure 3.**

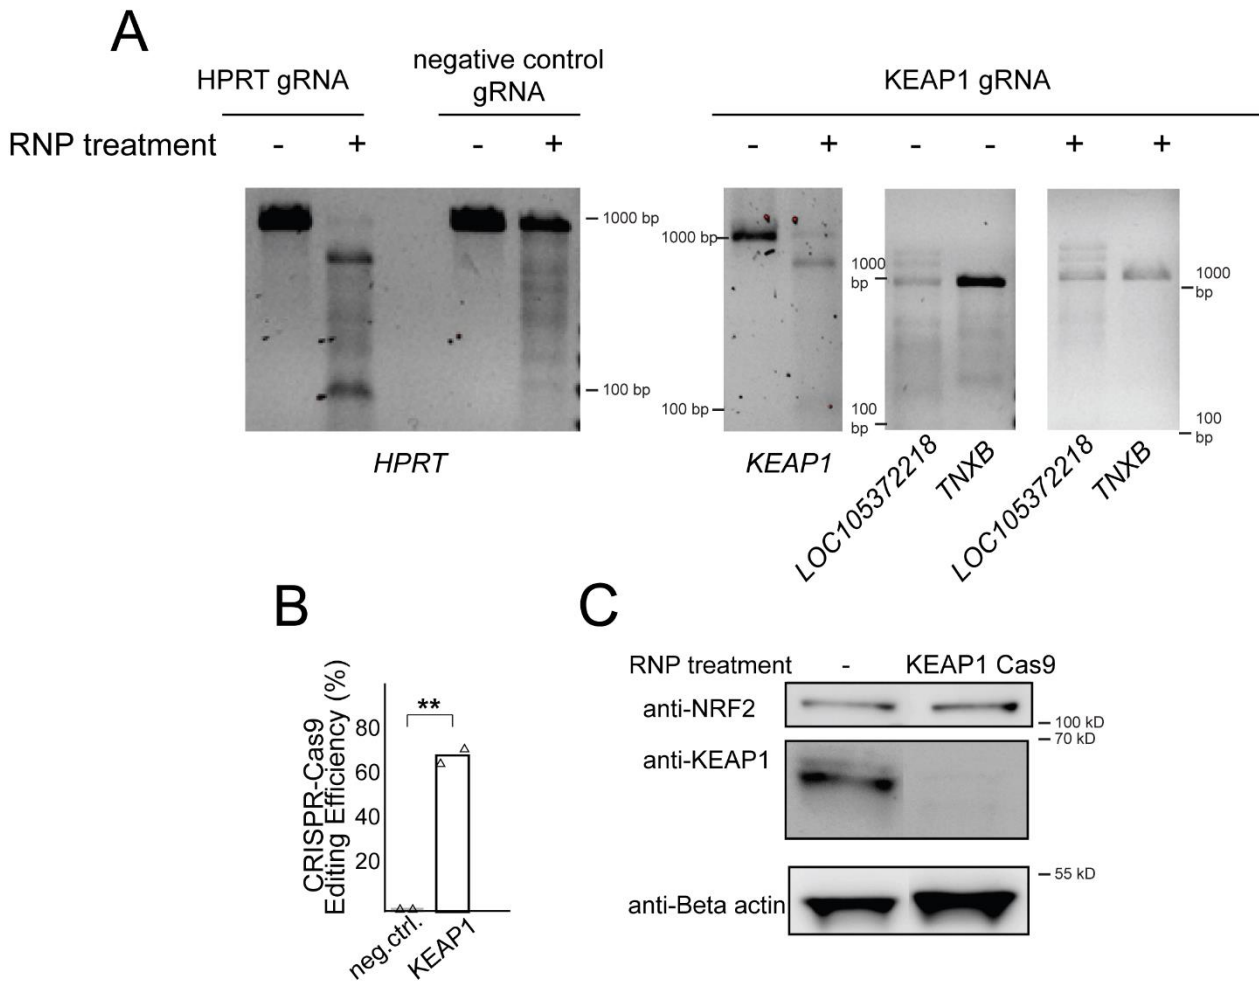

CRISPR-Cas9 genome editing detection. **(A)** Amplicons of control (HPRT), KEAP1, and off-target loci were digested by T7 endonuclease I (T7EI) to evaluate mismatch between annealed DNA strands from genomic DNA isolated from RNP treated HEK293T cells. HPRT gRNA RNP served as positive and negative control for Cas9 editing. KEAP1 gRNA RNP editing efficiency was assessed at both KEAP1 and off-target loci (LOC105372218; TNXB) and results were analyzed by gel electrophoresis. **(B)** Quantification of band intensity from T7EI-digested KEAP1 gRNA RNP-treated HEK293T cell amplicons was performed using the Image J program (version 1.52d) [N=2; p=0.001, one-sided t-test]. **(C)** Western blot of cell lysates from HEK293T cells treated with KEAP1 gRNA Cas9 RNP demonstrates loss of KEAP1 expression. Source data are provided as a Source Data file. All data are presented as mean values. All error bars represent standard error. This immunoblot experiment was repeated twice, with each independent replicate showing similar results.

## Supplementary Figure 4.

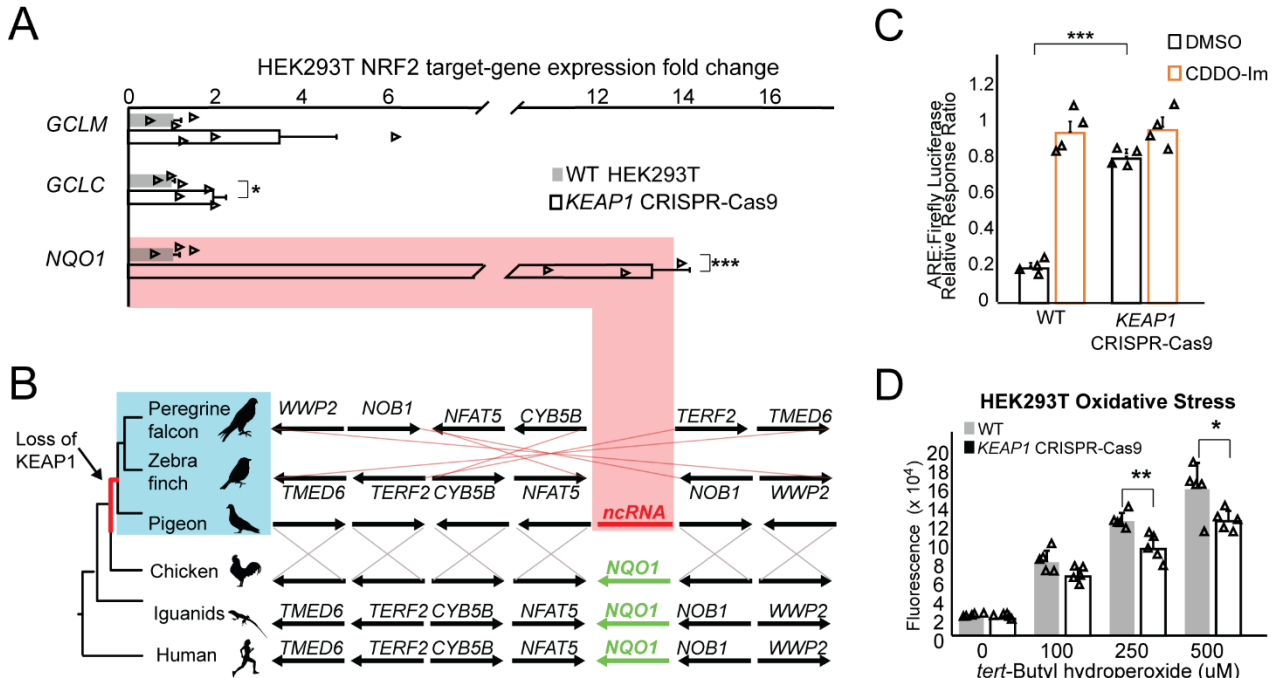

Increased NRF2 activity and decreased oxidative stress in KEAP1-gRNA-Cas9 treated HEK293T cells. **(A)** Disruption of KEAP1 function through CRISPR-Cas9 genome editing in HEK293T cells leads to a significant overexpression of *NQO1*—an important NRF2-regulated detoxification enzyme – and *GCLC*<sup>32</sup> [ $N=3$ ; one-sided t-test]. **(B)** *NQO1* is deleted in Neoaves genomes despite high syntenic conservation of neighboring genes across Human, Anolis, and Chicken. **(C)** When treated with 50nM of the KEAP1-mediated NRF2-activator CDDO-Im<sup>66</sup>, the induced NRF2(ARE)-driven Firefly luciferase expression in Cas9-RNP-treated HEK293T cells is significantly muted relative to that of WT [ $N=4$  biologically independent cells;  $p=5.6 \times 10^{-7}$ , one-sided t-test]. **(D)** Decreased cellular oxidative stress results from KEAP1 loss-of-function in HEK293T cells treated with *tert*-Butyl hydroperoxide [ $N=5$  biologically independent cells; 250uM tBh,  $p=0.002$ ; 500uM tBh,  $p=0.017$ ; one-sided t-test]. Source data are provided as a Source Data file. All data are presented as mean values. All error bars represent standard error.

## Supplementary Figure 5.

Chicken

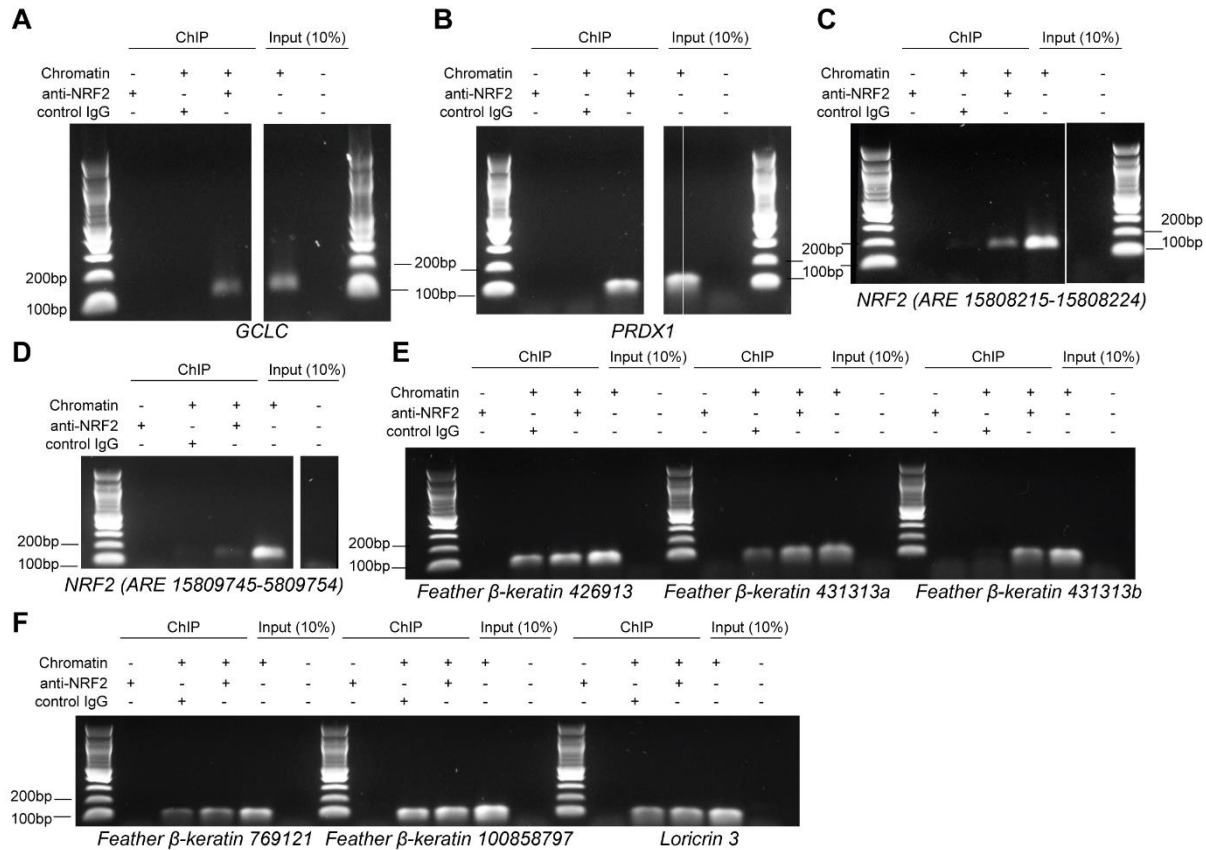

Neoaves

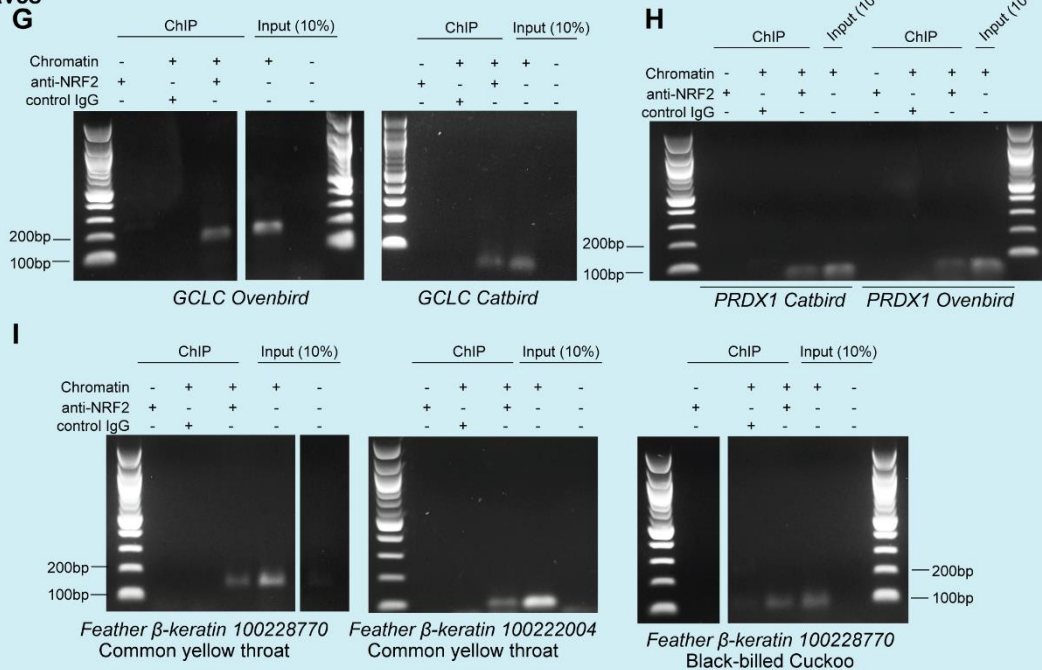

Validation of PCR amplicons quantified in qPCR analysis of Avian Chromatin. These experiments were repeated twice each, with each independent replicate showing similar results. Source data are provided as a Source Data file.

Supplementary Figure 6.

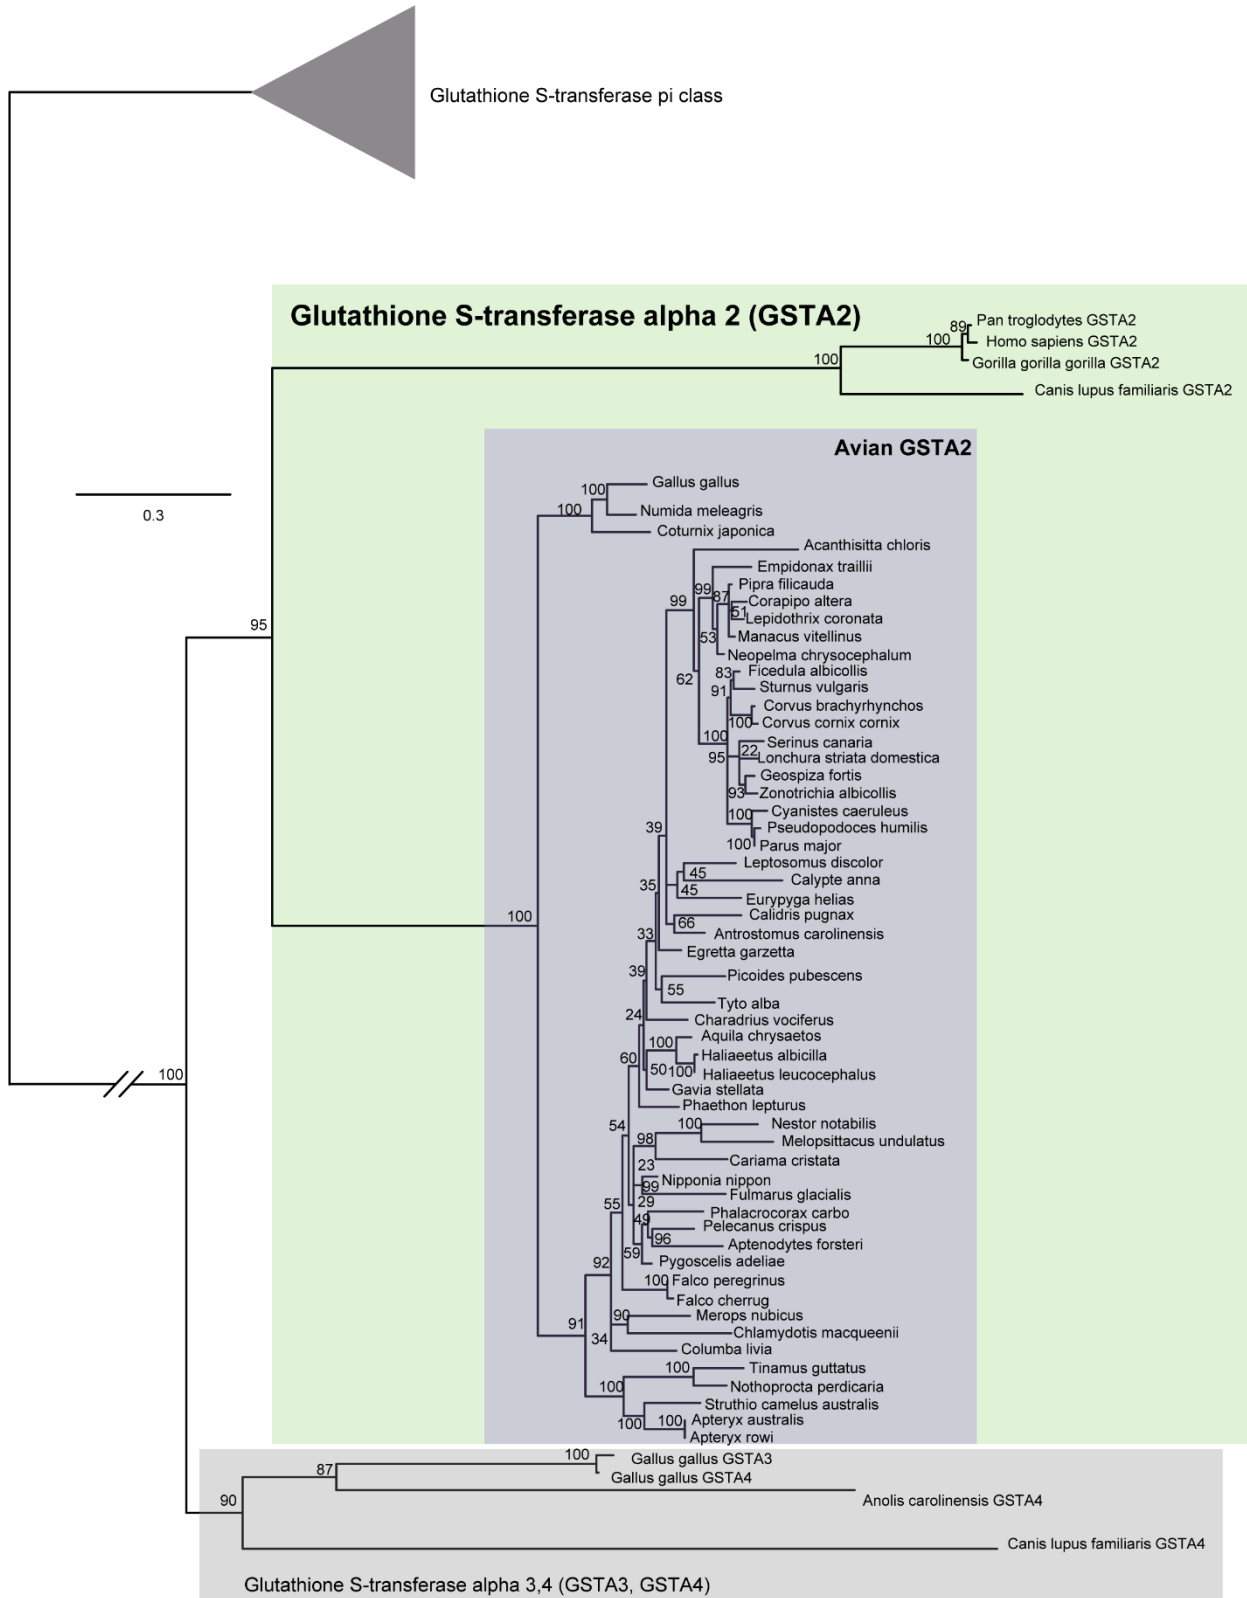

GSTA2 gene tree generated to confirm identity of GSTA2 coding-sequences

## Supplementary Figure 7.

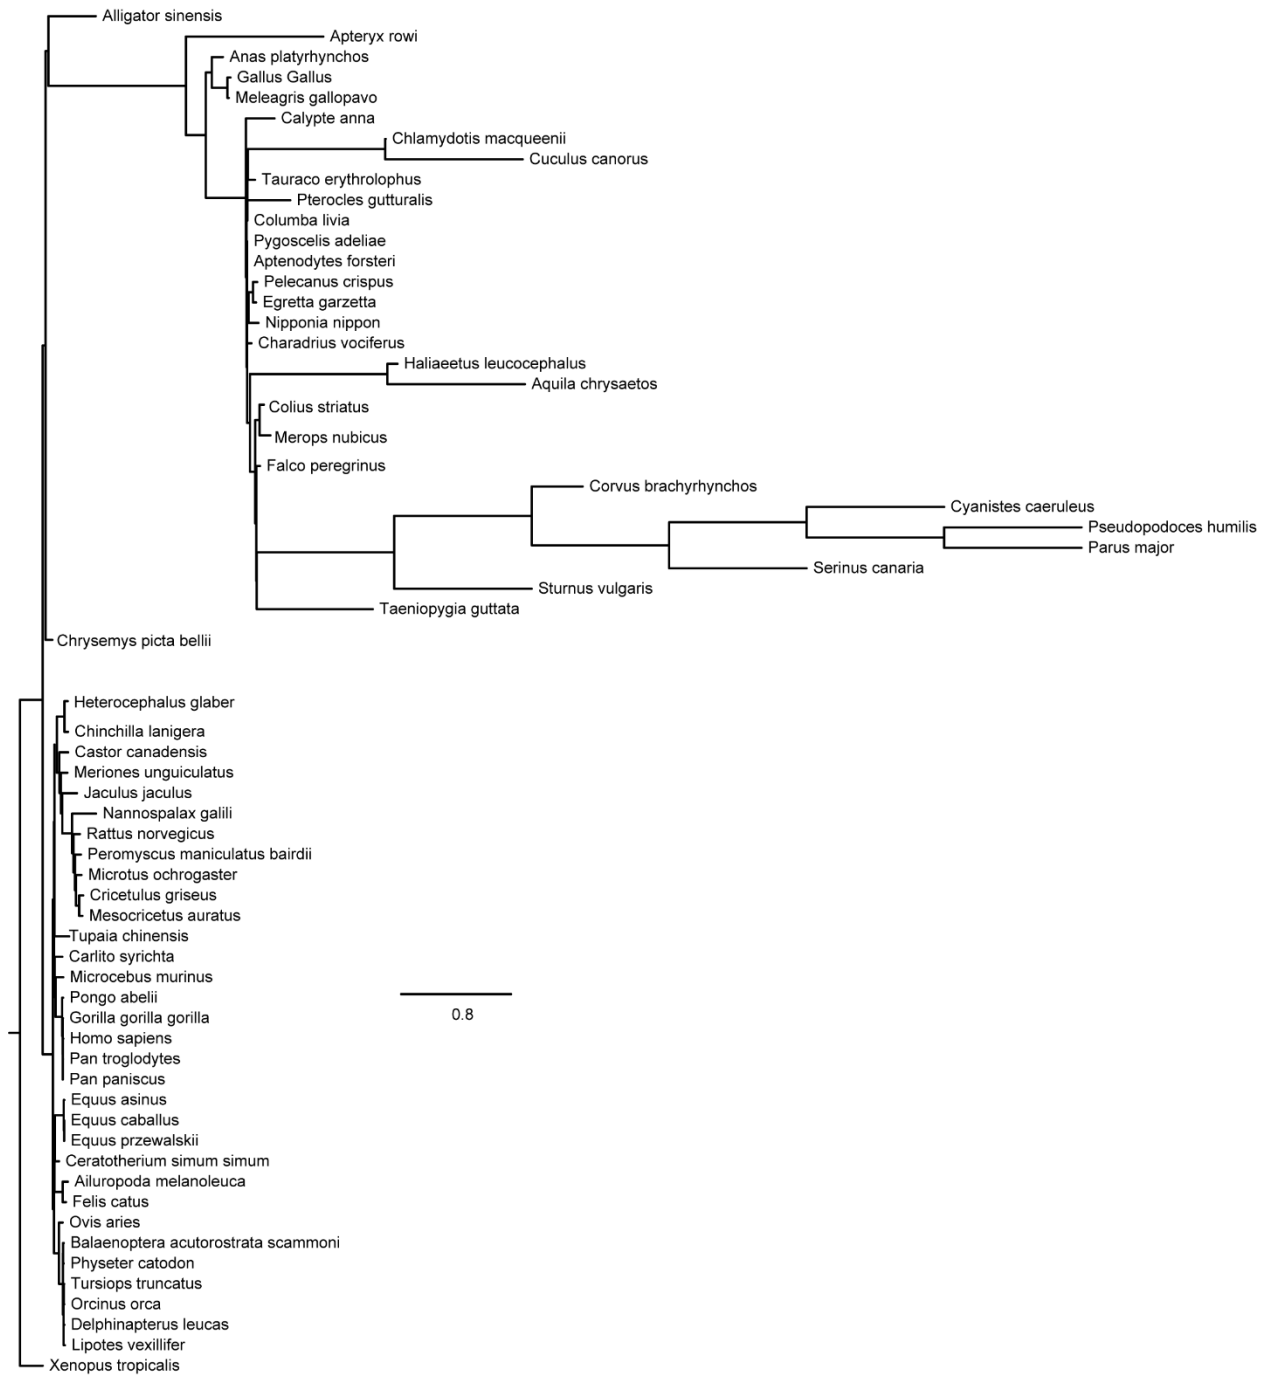

Species tree used in statistical analyses of *KEAPI* evolutionary rates, with branch lengths estimated by PAML.



Supplementary Figure 8.

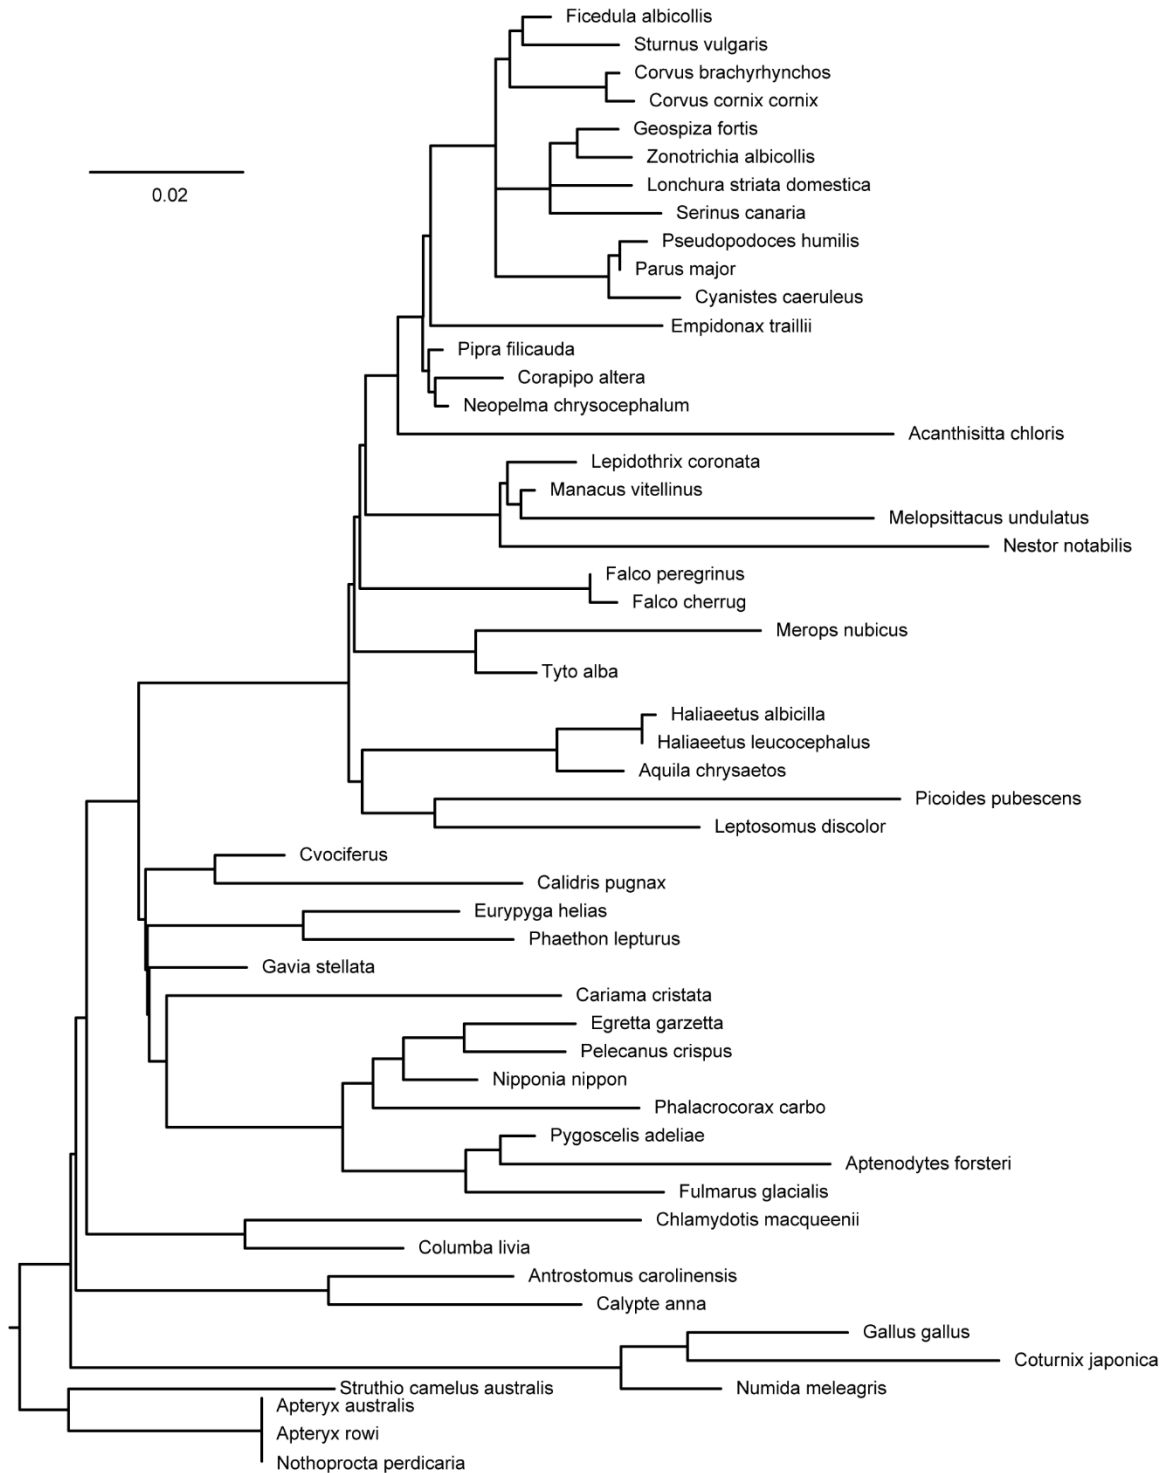

Species tree used in statistical analyses of *GSTA2* evolutionary rates, with branch lengths estimated by PAML.

## Supplementary Figure 9

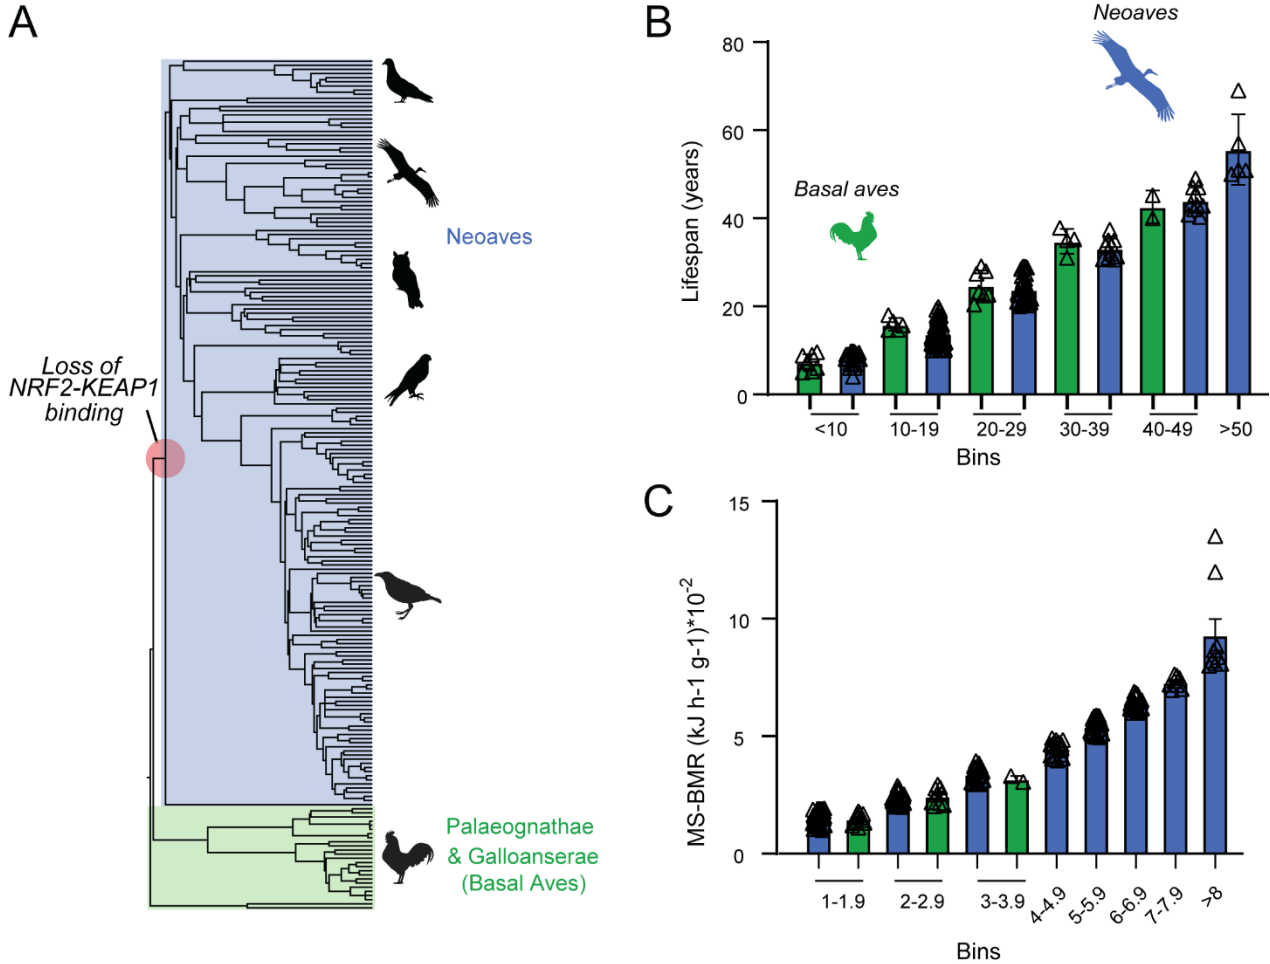

(A) Phylogenetic relationships of avian taxa for which both MS-BMR and lifespan data were available (Methods). Red highlight denotes the Neoavian ancestor where KEAP1 binding of NRF2 was lost. Neoaves and basal Aves species stratified into (B) lifespan groups [Neoaves:  $n=180$  biologically independent animals; Basal Aves:  $n=25$  biologically independent animals] and (C) mass-specific basal metabolic rate (MS-BMR) groups [Neoaves:  $n=175$  biologically independent animals; Basal Aves:  $n=23$  biologically independent animals]. Within each group the mean lifespans and MS-BMR of basal Aves and Neoaves were statistically indistinguishable (Mann-Whitney; Supplementary Table 11). All error bars represent standard error. Source data are provided as a Source Data file. All data are presented as mean values.

**Supplementary Table 1.**

Non-avian genome accession numbers

| scientific name                            | accession      |
|--------------------------------------------|----------------|
| <i>Drosophila melanogaster</i>             | NP_788685.1    |
| <i>Danio rerio</i>                         | XM_021476739   |
| <i>Latimeria chalumnae</i>                 | XM_005994311   |
| <i>Xenopus tropicalis</i>                  | NM_001008023   |
| <i>Lipotes vexillifer</i>                  | XM_007460670   |
| <i>Delphinapterus leucas</i>               | XM_022557191.1 |
| <i>Orcinus orca</i>                        | XM_012535762   |
| <i>Tursiops truncatus</i>                  | XM_019933070   |
| <i>Physeter catodon</i>                    | XM_024134256   |
| <i>Balaenoptera acutorostrata scammoni</i> | XM_007168981   |
| <i>Ovis aries</i>                          | XM_027969637   |
| <i>Felis catus</i>                         | XM_023245303   |
| <i>Ailuropoda melanoleuca</i>              | XM_002921371   |
| <i>Equus przewalskii</i>                   | XM_008537450.1 |
| <i>Equus caballus</i>                      | XM_023645423   |
| <i>Equus asinus</i>                        | XM_014865526   |
| <i>Ceratotherium simum simum</i>           | XM_004442630   |
| <i>Pan paniscus</i>                        | XM_008961848   |
| <i>Pan troglodytes</i>                     | XM_009434584   |
| <i>Homo sapiens</i>                        | XM_011528452.1 |
| <i>Gorilla gorilla gorilla</i>             | XM_019015776.1 |
| <i>Pongo abelii</i>                        | XM_009252776   |
| <i>Microcebus murinus</i>                  | XM_012790647   |
| <i>Carlito syrichta</i>                    | XM_008050920   |
| <i>Mesocricetus auratus</i>                | XM_021232069   |
| <i>Cricetulus griseus</i>                  | XM_027411505   |
| <i>Microtus ochrogaster</i>                | XM_013346291   |
| <i>Peromyscus maniculatus bairdii</i>      | XM_006987015   |
| <i>Rattus norvegicus</i>                   | XM_006242591   |
| <i>Nannospalax galili</i>                  | XM_008850040   |
| <i>Jaculus jaculus</i>                     | XM_004667452   |
| <i>Meriones unguiculatus</i>               | XM_021649200   |
| <i>Castor canadensis</i>                   | XM_020174298   |
| <i>Heterocephalus glaber</i>               | XM_004865503   |
| <i>Chinchilla lanigera</i>                 | XM_013505131   |
| <i>Tupaia chinensis</i>                    | XM_027765540   |
| <i>Python bivittatus</i>                   | XM_007426568   |
| <i>Pogona vitticeps</i>                    | XM_020798692   |
| <i>Anolis carolinensis</i>                 | XM_003216399   |
| <i>Chrysemys picta bellii</i>              | XM_008175416   |

|                                         |                |
|-----------------------------------------|----------------|
| <i>Alligator sinensis</i>               | XM_006023442.3 |
| <i>Ctenopharyngodon idella (Keap1b)</i> | KJ729125       |
| <i>Cyprinus carpio (Keap1a)</i>         | JX470752       |
| <i>Danio rerio (Keap1a)</i>             | NM_182864      |

## Supplementary Table 2.

Analyses of selection on Mammalian KEAP1 using PAML random sites models.

| Model     | <i>lnL</i> | Parameters <sup>1</sup> |              |                     | Null | <i>p</i> [df] <sup>2</sup> |
|-----------|------------|-------------------------|--------------|---------------------|------|----------------------------|
|           |            | $\omega_0/p$            | $\omega_1/q$ | $\omega_2/\omega_p$ |      |                            |
| M0        | -10727.53  | 0.01                    | -            | -                   | N/A  | -                          |
| M1a       | -10699.67  | 0.01 (98%)              | 1.00 (2%)    | -                   | M0   | 1 [1]                      |
| M2a       | -10699.67  | 0.01 (98%)              | 1.00 (1%)    | 1.00 (1%)           | M1a  | 1 [2]                      |
| M3        | -10565.06  | 0.00 (68%)              | 0.03 (26%)   | 0.18 (6%)           | M0   | <b>0.000</b> [4]           |
| M7        | -10569.21  | 0.10                    | 4.24         | -                   | N/A  | -                          |
| <b>M8</b> | -10569.21  | 0.10                    | 4.24         | 1.00                | M7   | 1 [2]                      |

<sup>1</sup> $\omega$  values of each site class are shown for model M0-M3 ( $\omega_0$ – $\omega_2$ ) with the proportion of each site class in parentheses. For M7 and M8, the shape parameters, p and q, which describe the beta distribution are listed instead. In addition, the  $\omega$  value for the positively selected site class ( $\omega_p$ , with the proportion of sites in parentheses) is shown for M8.

<sup>2</sup>Significant *p*-values ( $\alpha \leq 0.05$ ) are bolded. Degrees of freedom are given in square brackets after the *p*-values. Significance was determined through a likelihood-ratio test of null and alternative models, with reference to a  $\chi^2$  distribution.

Abbreviations—*lnL*, ln Likelihood; *p*, *p*-value; N/A, not applicable.

### Supplementary Table 3.

Analyses of recombination (GARD HYPHY) in Avian KEAP1 coding-sequences.

| <b>Breakpoints</b> | <b>AICc</b> | <b>Delta AICc</b> | <b>Segments (human nucleotide numbering)</b> | <b>Significant topological incongruence breakpoints (LHS; RHS p-values)<sup>1</sup></b> |
|--------------------|-------------|-------------------|----------------------------------------------|-----------------------------------------------------------------------------------------|
| 0                  | 53827.95    | ----              | 166-1896                                     | ----                                                                                    |
| 1                  | 50358.33    | 3469.62           | 166-1430;<br>1431-1896                       | ----                                                                                    |
| 2                  | 48310.18    | 2048.15           | 166-630; 631-1411; 1412-1896                 | 631<br>(0.0004;0.0004);<br>1412<br>(0.0004;0.0004)                                      |

<sup>1</sup> Shimodaira and Hasegawa (1999) test (SH test) as described in Ref 73.

**Supplementary Table 4.**

Accession numbers for sequences generated in this study

| <b>Definition</b>                                                                    | <b>Accession</b> |
|--------------------------------------------------------------------------------------|------------------|
| Gallus gallus NF-E2-related factor 2 (NRF2) mRNA complete cds                        | MN416129         |
| Zonotrichia albicollis Kelch-like ECH-associated protein 1 (KEAP1) mRNA partial cds  | MN416130         |
| Zonotrichia albicollis NF-E2-related factor 2 (NRF2) mRNA complete cds               | MN416131         |
| Gallus gallus Kelch-like ECH-associated protein 1 (KEAP1) mRNA complete cds          | MN416132         |
| Zonotrichia albicollis Kelch-like ECH-associated protein 1 (KEAP1) gene, partial cds | MN416133         |

### Supplementary Table 5.

Results of Clade Model D (CmD) analyses of Tetrapod *KEAPI* under various partitions.

| Model & Foreground <sup>1</sup> | $\Delta AIC$ | $\ln L$   | Parameters <sup>3</sup> |               |                                                  | Null | $p$ [df] <sup>4</sup> |
|---------------------------------|--------------|-----------|-------------------------|---------------|--------------------------------------------------|------|-----------------------|
|                                 |              |           | $\omega_0$              | $\omega_1$    | $\omega_2/\omega_d$                              |      |                       |
| M3                              | 10.25        | -11019.64 | 0.001(38%)              | 0.02(48%)     | 0.13 (14%)                                       | N/A  | -                     |
| CmD_ <i>Passerines</i>          | 7.44         | -11017.24 | 0.002 (41%)             | 0.12 (16%)    | 0.01 (44%)<br>Passerines:0<br>.04                | M3   | <b>0.02</b><br>[1]    |
| CmD_ <i>Birds vs. Mammals</i>   | <b>0.00*</b> | -11012.51 | 0.001<br>(41%)          | 0.02<br>(46%) | 0.25 (13%)<br>Mammals:<br>0.08<br>Birds:<br>0.17 | M3   | <b>0.000</b><br>[2]   |

<sup>1</sup>The foreground partition is listed after the underscore for the clade models and consists of either: the clade of 'Passerines', 'Mammals', or the clade 'Birds'. In any partitioning scheme, the entire clade was tested, and all non-foreground data are present in the background partition.

<sup>2</sup>All  $\Delta AIC$  values are calculated from the lowest AIC model. The best fits are bolded with an asterisk (\*).

<sup>3</sup> $\omega_d$  is the divergent site class, which has a separate value for the foreground and background partitions.

<sup>4</sup>Significant  $p$ -values ( $\alpha \leq 0.05$ ) are bolded. Degrees of freedom are given in square brackets after the  $p$ -values. Significance was determined through a likelihood-ratio test of null and alternative models, with reference to a  $\chi^2$  distribution.

Abbreviations— $\ln L$ , ln Likelihood;  $p$ ,  $p$ -value;  $AIC$ , Akaike information criterion



**Supplementary Table 6.**

Avian specimens collected and analyzed in this study

| <b>Experiment</b>    | <b>Common name (biological replicates)</b> | <b>Species</b>                   | <b>Collection date</b> |
|----------------------|--------------------------------------------|----------------------------------|------------------------|
| qPCR                 | American Woodcock (n=2)                    | <i>Scolopax minor</i>            | October 2018           |
|                      | White-throated sparrow (n=3)               | <i>Zonotrichia albicollis</i>    |                        |
| ChIP, IB             | Ovenbird (n=4)                             | <i>Seiurus aurocapilla</i>       | May 2019               |
|                      | Black-billed cuckoo (n=1)                  | <i>Coccyzus erythrophthalmus</i> |                        |
| ChIP                 | Common yellowthroat (n=2)                  | <i>Geothlypis trichas</i>        |                        |
| ChIP, IF             | Gray catbird (n=1)                         | <i>Dumetella carolinensis</i>    |                        |
| ChIP, IB, IF<br>qPCR | Chicken (n=5)                              | <i>Gallus gallus</i>             |                        |
|                      |                                            |                                  | Dec 2018/May 2019      |

ChIP= chromatin immunoprecipitation; IB= immunoblot; qPCR= quantitative PCR; IF= immunofluorescence

### Supplementary Table 7.

Antioxidant response elements (ARE) detected in avian genomes

| Reference Organism                 | Genome (Chromosome accession)                           | Gene                   | ARE                       | Coordinates |          |         |
|------------------------------------|---------------------------------------------------------|------------------------|---------------------------|-------------|----------|---------|
|                                    |                                                         |                        |                           |             |          |         |
| Chicken                            | Chicken GRCg6a (Chr 3 NC_006090.5)                      | GCLC                   | TGACACAGCT                | 88173981    | 88173990 |         |
|                                    | Chicken GRCg6a (Chr 8 NC_006095.5)                      | PRDX1                  | TGAGAAAGCC                | 21508092    | 21508101 |         |
|                                    | Chicken GRCg6a (Chr7 NC_006094.5)                       | NFE2L2                 | TGAGACAGCA                | 15809745    | 15809754 |         |
|                                    |                                                         |                        | TGAGAAAGCG                | 15808215    | 15808224 |         |
|                                    | Chicken GRCg6a (Chr25 NC_006112.4)                      | Feather keratin 1-like | TGAGTAAGCA                | 2178857     | 2178866  |         |
|                                    |                                                         |                        | feather beta keratin-like | TGACAAATCT  | 2270450  | 2270459 |
|                                    |                                                         |                        |                           | TGAGACATCT  | 2270135  | 2270144 |
|                                    |                                                         |                        | feather keratin 1-like    | TGAGAAAGCA  | 3122498  | 3122507 |
|                                    |                                                         |                        | feather keratin 1-like    | TGAGTCATCG  | 3125460  | 3125469 |
|                                    |                                                         |                        | Loricrin 3                | TGACACAGCC  | 3224257  | 3224266 |
| Chicken GRCg6a (Chr 3 NC_006090.5) | GSTA2                                                   | TGACAAAGCT             | 88412260                  | 88412269    |          |         |
| Zebra finch                        | Taeniopygia_guttata 3.2.4 (Chr 3 NC_011466.1)           | GCLC                   | TGACACAGCT                | 90519291    | 90519300 |         |
|                                    | Taeniopygia_guttata 3.2.4 (GCF_000151805.1) NC_011471.1 | NFE2L2                 | None                      | N/A         | N/A      |         |
| Common Cuckoo                      | Cuculus canorus (GCF_000709325.1) NW_009243908.1        | NFE2L2                 | none                      | N/A         | N/A      |         |
| Manakin                            | Manacus vitellinus (GCF_001715985.3) NW_021939471.1     | NFE2L2                 | None                      | N/A         | N/A      |         |
| Common Canary                      | Serinus canaria SCA1 (GCF_000534875.1) NW_007931131.1   | PRDX1                  | TGAGTCATCT                | 17942995    | 17943004 |         |
| Starling                           | Sturnus_vulgaris-1.0(GCF_001447265.1) NW_014650503.1    |                        | TGAGTCATCT                | 1002016     | 1002025  |         |
| Sparrow                            | GeoFor_1.0(GCF_000277835.1) NW_005054347.1              |                        | TGAGTCATCT                | 3368547     | 3368556  |         |
| Zebra finch                        | Zebrafinch 3.2.4 (Chr 25 NC_011489.1)                   | feather keratin 1-like | TGACAAATCA                | 789704      | 789714   |         |

|  |  |                              |            |        |        |
|--|--|------------------------------|------------|--------|--------|
|  |  | feather<br>keratin<br>4-like | TGACAAATCA | 795758 | 795767 |
|--|--|------------------------------|------------|--------|--------|

**Supplementary Table 8.**

GSTA2 accession numbers (presence of ARE investigated)

| Name                              | accession      |
|-----------------------------------|----------------|
| <i>Apteryx australis</i>          | XM_013953262   |
| <i>Acanthisitta chloris</i>       | XM_009084876   |
| <b><i>Aquila chrysaetos</i></b>   | XM_030037898   |
| <i>Aptenodytes forsteri</i>       | XM_009288570   |
| <i>Apteryx rowi</i>               | XM_026086143   |
| <i>Corapipo altera</i>            | XM_027641169   |
| <i>Calypte anna</i>               | XM_008495629   |
| <i>Corvus brachyrhynchos</i>      | XM_008637649   |
| <i>Cyanistes caeruleus</i>        | XM_023922506   |
| <i>Antrostomus carolinensis</i>   | XM_010170651   |
| <i>Corvus cornix cornix</i>       | XM_010406318   |
| <i>Cariama cristata</i>           | XM_009709554   |
| <i>Coturnix japonica</i>          | XM_015859291   |
| <b><i>Columba livia</i></b>       | XM_005506790   |
| <i>Chlamydotis macqueenii</i>     | XM_010116437   |
| <i>Calidris pugnax</i>            | XM_014948928   |
| <i>Charadrius vociferus</i>       | XM_009882144   |
| <i>Egretta garzetta</i>           | XM_009638768   |
| <i>Eurypyga helias</i>            | XM_010160429   |
| <i>Empidonax traillii</i>         | XM_027898226   |
| <i>Ficedula albicollis</i>        | XM_005044193   |
| <i>Falco cherrug</i>              | XM_027809110   |
| <i>Fulmarus glacialis</i>         | XM_009585672   |
| <i>Falco peregrinus</i>           | XM_027787880   |
| <i>Gallus gallus</i>              | XM_015284825   |
| <i>Geospiza fortis</i>            | XM_005426381   |
| <i>Gavia stellata</i>             | XM_009812395   |
| <i>Haliaeetus albicilla</i>       | XM_009922637   |
| <i>Haliaeetus leucocephalus</i>   | XM_010561073   |
| <i>Lepidothrix coronata</i>       | XM_017814538   |
| <i>Leptosomus discolor</i>        | XM_009956935.1 |
| <i>Lonchura striata domestica</i> | XM_021551287   |
| <i>Merops nubicus</i>             | XM_008940286   |
| <i>Melopsittacus undulatus</i>    | XM_005153205   |
| <b><i>Manacus vitellinus</i></b>  | XM_018088908   |
| <i>Neopelma chrysocephalum</i>    | XM_027690338   |
| <i>Numida meleagris</i>           | XM_021389848   |
| <i>Nipponia nippon</i>            | XM_009461358   |
| <i>Nestor notabilis</i>           | XM_010022308   |
| <i>Nothoprocta perdicaria</i>     | XM_026034283   |
| <i>Pygoscelis adeliae</i>         | XM_009333197   |
| <i>Phalacrocorax carbo</i>        | XM_009508114   |

|                                      |              |
|--------------------------------------|--------------|
| <i>Pelecanus crispus</i>             | XM_009478080 |
| <i>Pipra filicauda</i>               | XM_027715482 |
| <i>Pseudopodoces humilis</i>         | XM_005521908 |
| <i>Phaethon lepturus</i>             | XM_010296442 |
| <b><i>Parus major</i></b>            | XM_015623193 |
| <i>Picoides pubescens</i>            | XM_009904173 |
| <i>Struthio camelus australis</i>    | XM_009677028 |
| <i>Serinus canaria</i>               | XM_018920082 |
| <i>Sturnus vulgaris</i>              | XM_014869515 |
| <i>Tyto alba</i>                     | XM_009962792 |
| <b><i>Zonotrichia albicollis</i></b> | XM_005495970 |

## Supplementary Table 9.

Analyses of selection on Avian *GSTA2* using PAML random sites models.

| Model     | <i>lnL</i> | Parameters <sup>1</sup> |              |                     | Null | <i>p</i> [df] <sup>2</sup> | Δ AIC <sup>3</sup> |
|-----------|------------|-------------------------|--------------|---------------------|------|----------------------------|--------------------|
|           |            | $\omega_0/p$            | $\omega_1/q$ | $\omega_2/\omega_p$ |      |                            |                    |
| M0        | -6143.41   | 0.24                    | -            | -                   | N/A  | -                          | 699.9              |
| M1a       | -5844.16   | 0.05 (79%)              | 1.00 (21%)   | -                   | M0   | <b>0.000</b> [1]           | 103.38             |
| M2a       | -5802.86   | 0.05 (78%)              | 1.00 (19%)   | 3.87 (3%)           | M1a  | 1 [2]                      | 24.78              |
| M3        | -5796.21   | 0.03 (73%)              | 0.68 (24%)   | 3.51 (3%)           | M0   | <b>0.000</b> [4]           | 13.49              |
| M8a       | -5827.47   | 0.27                    | 2.58         | 1.00 (13%)          | N/A  | -                          | 72                 |
| M7        | -5835.17   | 0.14                    | 0.49         | -                   | N/A  | -                          | 85.4               |
| <b>M8</b> | -5790.47   | 0.17                    | 0.71         | 3.49 (2%)           | M7   | <b>0.000</b> [2]           | <b>0*</b>          |
|           |            |                         |              |                     | M8a  | <b>0.000</b> [1]           |                    |

<sup>1</sup> $\omega$  values of each site class are shown for model M0-M3 ( $\omega_0$ – $\omega_2$ ) with the proportion of each site class in parentheses. For M7 and M8, the shape parameters, *p* and *q*, which describe the beta distribution are listed instead. In addition, the  $\omega$  value for the positively selected site class ( $\omega_p$ , with the proportion of sites in parentheses) is shown for M8.

<sup>2</sup>Significant *p*-values ( $\alpha \leq 0.05$ ) are bolded. Degrees of freedom are given in square brackets after the *p*-values. Significance was determined through a likelihood-ratio test of null and alternative models, with reference to a  $\chi^2$  distribution.

<sup>3</sup>Model fits were assessed by Akaike information criterion differences to the best fitting model (bolded asterisk). Abbreviations—*lnL*, ln Likelihood; *p*, *p*-value; **N/A**, not applicable.

### Supplementary Table 10.

Conventional and phylogenetically-independent non-parametric Kruskal-Wallis tests comparing mass-specific basal metabolic rate (MS-BMR) or lifespan of various groups using non-functional (0) vs functional (1) KEAP1-based categories

| Group <sup>1</sup>                           | Category | Response Variables | N  | Median | Mean Rank | Z-value | DF | H-value | Conventional P value | Phylogenetic P value* |                                              |   |          |       |      |       |       |      |              |             |     |    |       |      |      |                                              |   |          |   |      |     |       |   |      |       |     |
|----------------------------------------------|----------|--------------------|----|--------|-----------|---------|----|---------|----------------------|-----------------------|----------------------------------------------|---|----------|-------|------|-------|-------|------|--------------|-------------|-----|----|-------|------|------|----------------------------------------------|---|----------|---|------|-----|-------|---|------|-------|-----|
| <10 Lifespan                                 | 0        | MS-BMR             | 7  | 0.021  | 4.7       | -3.81   | 1  | 14.53   | <b>0.000</b>         | <b>0.03</b>           |                                              |   |          |       |      |       |       |      |              |             |     |    |       |      |      |                                              |   |          |   |      |     |       |   |      |       |     |
|                                              | 1        |                    | 27 | 0.061  | 20.8      | 3.81    |    |         |                      |                       | 10-19.9 Lifespan                             | 0 | 5        | 0.017 | 14.0 | -2.80 | 1     | 7.83 | <b>0.005</b> | <b>0.02</b> | 1   | 87 | 0.049 | 48.4 | 2.80 | Neoaves >0.08, basal Aves 0.02-0.029, MS-BMR | 0 | Lifespan | 9 | 10.1 | 8.1 | -1.10 | 1 | 1.22 | 0.270 | --- |
| 10-19.9 Lifespan                             | 0        |                    | 5  | 0.017  | 14.0      | -2.80   | 1  | 7.83    | <b>0.005</b>         | <b>0.02</b>           |                                              |   |          |       |      |       |       |      |              |             |     |    |       |      |      |                                              |   |          |   |      |     |       |   |      |       |     |
|                                              | 1        |                    | 87 | 0.049  | 48.4      | 2.80    |    |         |                      |                       | Neoaves >0.08, basal Aves 0.02-0.029, MS-BMR | 0 | Lifespan | 9     | 10.1 | 8.1   | -1.10 | 1    | 1.22         | 0.270       | --- | 1  | 9     | 14.7 | 10.9 | 1.10                                         |   |          |   |      |     |       |   |      |       |     |
| Neoaves >0.08, basal Aves 0.02-0.029, MS-BMR | 0        | Lifespan           | 9  | 10.1   | 8.1       | -1.10   | 1  | 1.22    | 0.270                | ---                   |                                              |   |          |       |      |       |       |      |              |             |     |    |       |      |      |                                              |   |          |   |      |     |       |   |      |       |     |
|                                              | 1        |                    | 9  | 14.7   | 10.9      | 1.10    |    |         |                      |                       |                                              |   |          |       |      |       |       |      |              |             |     |    |       |      |      |                                              |   |          |   |      |     |       |   |      |       |     |

Degrees of freedom (DF)

<sup>1</sup>Data was grouped according to either lifespan (years) or MS-BMR (kJ/h/g; see figures 5C-D, respectively).

\*Only significant conventional P values (<0.05) were further investigated for phylogenetic significance. Phylogenetic significance was determined by empirical null distribution generated by phylogenetic simulations. Bold P values are significant.

**Supplementary Table 11.**

Conventional Mann-Whitney testing equivalency between basal Aves vs Neoaves MS-BMR and lifespan stratifications

| <b>Group<sup>1</sup></b> | <b>Sample</b> | <b>N</b> | <b>Median</b> | <b>W-value</b> | <b>P value</b> |
|--------------------------|---------------|----------|---------------|----------------|----------------|
| <10 Lifespan             | Basal Aves    | 7        | 7.4           | 99.0           | 0.33           |
|                          | Neoaves       | 27       | 8.6           |                |                |
| 10-19 Lifespan           | Basal Aves    | 5        | 15.7          | 344.0          | 0.06           |
|                          | Neoaves       | 87       | 13.1          |                |                |
| 20-29 Lifespan           | Basal Aves    | 7        | 23.2          | 199.5          | 0.42           |
|                          | Neoaves       | 41       | 22.9          |                |                |
| 30-39 Lifespan           | Basal Aves    | 4        | 35.1          | 42.0           | 0.21           |
|                          | Neoaves       | 11       | 33.7          |                |                |
| 40-49 Lifespan           | Basal Aves    | 2        | 42.6          | 9.0            | 0.45           |
|                          | Neoaves       | 10       | 43.2          |                |                |
| 0.01-0.019 MS-BMR        | Basal Aves    | 12       | 0.015         | 256            | 0.44           |
|                          | Neoaves       | 35       | 0.016         |                |                |
| 0.02-0.029 MS-BMR        | Basal Aves    | 9        | 0.025         | 203            | 0.453          |
|                          | Neoaves       | 30       | 0.023         |                |                |
| 0.03-0.039 MS-BMR        | Basal Aves    | 2        | 0.032         | 18             | 0.55           |
|                          | Neoaves       | 21       | 0.034         |                |                |

<sup>1</sup>Data was grouped according to either lifespan (years) or MS-BMR (kJ/h/g ; see figures S9B-C, respectively).



## Supplementary Table 12.

Primer sequences used in this study

|                          | Template Species       | Gene                        | Forward                                     | Reverse                                    |                          |
|--------------------------|------------------------|-----------------------------|---------------------------------------------|--------------------------------------------|--------------------------|
| Avian NRF2 KEAP1 cloning | Chicken                | KEAP1                       | ATGTACGGCCCCGAATGCCA                        | ACAGGGGCACTCGTGGCG                         |                          |
|                          |                        | NRF2                        | ATGAACTTGATTGACATCCTT<br>TGGAGGC            | CAGTTTAGTCTCTGCCTTTCT<br>GCTTTTA           |                          |
|                          | White-throated sparrow | NRF2                        | ATGAACCTGATTGACATCCTT<br>TGGAGG             | AAGTTTAGTCCCCGACTGCC<br>TG                 |                          |
|                          |                        | KEAP1                       | CCAGCCCCGTCTTCAGGGCCA<br>TGTTACAGCGAGGCTGCG | CCCGGTTTGCACGGTCCAT<br>GGTGACGGCCACGCTCCAG |                          |
| ChIP qPCR                | Chicken                | GCLC                        | CTCATGTGGTAACGCCACCAA<br>AG                 | TGTGTCACAAGGGAAGAGTT<br>CTGC               |                          |
|                          |                        | PRDX1                       | TCGGCATTACCCGGGCTTTA                        | CTTTCTCATGGCGCAGTGCTT<br>A                 |                          |
|                          |                        |                             | CATCTGACTCATCCTGCCGTG<br>A                  | CTCAGCGCTTGGATGGTGG                        |                          |
|                          |                        | NFE2L2                      | GTAGTGGTAGTGGCACAGGT<br>ATGAAA              | GCCACAAGACAGCAACCTGT<br>GA                 |                          |
|                          |                        |                             | GGGACAATTTGGCCCCTGGA<br>AAT                 | CTACCTCAGCAATGCAGATC<br>CCTTT              |                          |
|                          |                        | Feather keratin 1-like      | GTGCCATGACTGGAAAGGTG<br>ATTTT               | CAGGCAAGGAGAGCCCACA<br>TTAA                |                          |
|                          |                        | feather beta keratin-like   | CTCGTGTCTGAGCTGACAAAT<br>CTGG               | GAGAGTGAGGAGTGATGTGC<br>AACA               |                          |
|                          |                        |                             | GCACCCAAGTGGATGAGACA<br>TCTC                | CTCCTCCTTGGCAAAGACTC<br>CTT                |                          |
|                          |                        | feather keratin 1-like      | CCTTAGCAGGAAGTCTGAGA<br>AAGCA               | TCAGATCCCCATGCTGAGGG<br>TATA               |                          |
|                          |                        | feather keratin 1-like      | CAACAGTCATGAGTCATCGTG<br>AGCT               | AAGTCACCTTCCCTCCTCTG<br>GTT                |                          |
|                          | Loricrin 3             | CATTGCTTTGACACAGCCACT<br>GT | AGCAGCACCGCTCACACT                          |                                            |                          |
|                          | Neoaves species        | GCLC                        | CTCACTGCCCAAAGCTAGA<br>AAG                  | TGATAGCCAACAGCTGTGTC<br>AG                 |                          |
|                          |                        | PRDX1                       | CATCTGGTCCCAAATGAGTC<br>ATCTCT              | GTGTAGTGTTGCTGGGTGAC<br>CATAAC             |                          |
|                          |                        |                             | TGAGTCATCTCTGGGTGAACC                       |                                            |                          |
|                          |                        | feather keratin 1-like      | GGAGGGCCAGATGGTCAGT                         | GCAGGACGTGCCCAGTCA                         |                          |
|                          |                        | feather keratin 4-like      | GGAACAGGAGGGGTTTAGAG<br>GTT                 | AATTTGAGGCACAGCTGGAA<br>GAAC               |                          |
|                          | HEK Cell qPCR          | Human                       | GCLM                                        | TGTGTGATGCCACCAGATTT                       | TTCACAATGACCGAATACCG     |
|                          |                        |                             | GCLC                                        | ACCATCATCAATGGGAAGGA                       | GCGATAAACTCCCTCATCCA     |
|                          |                        |                             | HO1                                         | AACTTTCAGAAGGGCCAGGT                       | GTAGACAGGGGCGAAGACT<br>G |
|                          |                        |                             | GSTM1                                       | TTCCAATCTGCCCTACTTG                        | TCTCCAAAATGTCCACACGA     |
| NQO1                     |                        |                             | CAGCTCACCGAGAGCCTAGT                        | ACCACCTCCCATCCTTTCTT                       |                          |
| Avian qPCR               | Chicken and            | NRF2                        | GCAGAACATAGAGCAAGTTT<br>GGGAAG              | GTGCTCACCTCAGCCAGGTT                       |                          |

|            |                      |                      |                        |                       |
|------------|----------------------|----------------------|------------------------|-----------------------|
|            | Neoaves species      | GAPDH                | GGAGGGTCTCATGACCACTGTC | CAGGAGACAACCTGGTCCTCT |
|            |                      | GCLC                 | CTAGAGCCACTGAAGAACAAC  | GTGTGCAATATGCTGTGCCAA |
|            |                      | GCLM                 | CARDAAGATTGTTGCCATAG   | CATCACRCAACAKGAAGCTAG |
|            |                      | PRDX1                | TGCATACAGRGGTCTSTTCA   | CTTCCAGCCAGCTGGGCACA  |
|            |                      | TXNRD1               | GRTTTCMCATTGCCACTGGTG  | TARGAAGCTCCAACCACCAG  |
|            |                      | PTGR1                | GGAGAGTTGCTGCTTGAATCA  | GCAACCTGCGTGCCAATCAT  |
|            |                      |                      | GTGTTTC                | TA                    |
|            | GAGAGCTGCTGCTTGAATCA | GCAACCTGCGTGCCTATCAT |                        |                       |
|            | GTGTTT               | TATG                 |                        |                       |
| T7EI assay | Human                | KEAP1                | GGCTAATTGCGTAGGGCTTTG  | TCAATGAGGCGCTCCATGAC  |
|            |                      | TNXB                 | CCACTCTTCCTAGTGCCTCAG  | CCAAGTCCCGCTCACAGGAT  |
|            |                      | LOC105372<br>218     | TGCTGGAGGGAGAGGCAC     | ACAGCGTGCACAGACCCA    |

**Supplementary Table 13.**

crRNA (Hs.Cas9.KEAP1.1.AD) used in CRISPR-Cas9 genome editing of *KEAP1* in HEK293T cells (information provided by Integrated DNA Technologies)

| Position | Strand | Sequence             | PAM | On-Target Score | Off-Target Score (Genes and loci)                     |
|----------|--------|----------------------|-----|-----------------|-------------------------------------------------------|
| 10499768 | -      | GGTCAAGTACCAGGATGCAC | CGG | 98              | 71 (TNXB chr6:-32081514;LOC105372218 chr18:-77983723) |
