# Supplementary material for: Adaptation of the master antioxidant response connects metabolism, lifespan and feather development pathways in birds
Source: PubMed Central journal article supplement (PMC7234996; doi:10.1038/s41467-020-16129-4), 2020-05-18
Supplement: 41467_2020_16129_MOESM4_ESM.pdf [file 41467_2020_16129_MOESM4_ESM.pdf]

### **Description of Additional Supplementary Files**

File Name: Supplementary Data 1

Description: Avian genomes investigated for KEAP1 coding-sequences
